# Supplementary material for: Reduced SULT2B1b expression alleviates ox-LDL-induced inflammation by upregulating miR-148-3P via inhibiting the IKKβ/NF-κB pathway in macrophages
Source: PubMed Central journal article supplement (PMC7906218; doi:10.18632/aging.202273), 2021-01-10
Supplement: aging-13-202273-s002.pdf [file aging-13-202273-s002.pdf]

## SUPPLEMENTARY TABLES

### Supplementary Table

**Supplementary Table 1. The probe sequence of biotin-labelled oligonucleotides.**

|                |                                          |
|----------------|------------------------------------------|
| Probe sequence | GAUUGUCCUGAGAGAUUGACACUGUGCACUGGUAACUGUC |
|----------------|------------------------------------------|

**Supplementary Table 2. Primer sequences for RT-qPCR.**

| Primer name                  | Target species | Forward sequence<br>5'→3'                     | Reverse sequence<br>5'→3' |
|------------------------------|----------------|-----------------------------------------------|---------------------------|
| SULT2B1b                     | mouse          | CTGCTTGCCTGTCTTGGTCAC                         | AACTGCCTCTCTGCTGTCCTAC    |
| IL-6                         | mouse          | GCTGACCTCTGGACGCTTAC                          | CCCATGCCTAACAACTCCAT      |
| TNF- $\alpha$                | mouse          | CCACCACGCTCTTCTGTCTA                          | TGTCCTTCTTGCCCTCCTAA      |
| $\beta$ -actin               | mouse          | CAGATCATGTTTGAGACCTTCAAC                      | TCGAAGTCTAGAGCAACATAGCAC  |
| miR-6995-3p                  | mouse          | TGTGTCCCCTTCCTCTCACAG                         | CTCTACAGCTATATTGCCAGCC    |
| miR-129-5p                   | mouse          | CTTTTTGCGGTCTGGGCTTG                          | CTCTACAGCTATATTGCCAGCC    |
| miR-155-5p                   | mouse          | TTAATGCTAATTGTGATAGGGGT                       | CTCTACAGCTATATTGCCAGCC    |
| miR-192-5p                   | mouse          | AAGCCCTTACCCCAAAAAGTAT                        | CTCTACAGCTATATTGCCAGCC    |
| miR-148a-3p                  | mouse          | TCAGTGCCTACAGAACTTTGT                         | CTCTACAGCTATATTGCCAGCC    |
| Reverse transcription primer |                | CTCTACAGCTATATTGCCAGCCACACTAATTTTTTTTTTTTTTTT |                           |
| U6                           |                | GTGCTTACTTTAGCAGCACATATATGA                   | AATATGGAATGCTTCACAAATGC   |

**Supplementary Table 3. The sequence of the small interfering RNA producing optimal mouse SULT2B1b knockdown.**

|                     |                     |
|---------------------|---------------------|
| SiSULT2B1b sequence | GGAGGTGAATACTTCAGAT |
|---------------------|---------------------|
