# Supplementary material for: Reduced SULT2B1b expression alleviates ox-LDL-induced inflammation by upregulating miR-148-3P via inhibiting the IKKβ/NF-κB pathway in macrophages
Source: publisher site journal article supplement (doi:10.18632/aging.202273), 2021-01-10
Supplement: Supplementary file [file aging-v13i3-202273-supplementary-material-SD1.pdf]

## SUPPLEMENTARY FIGURES

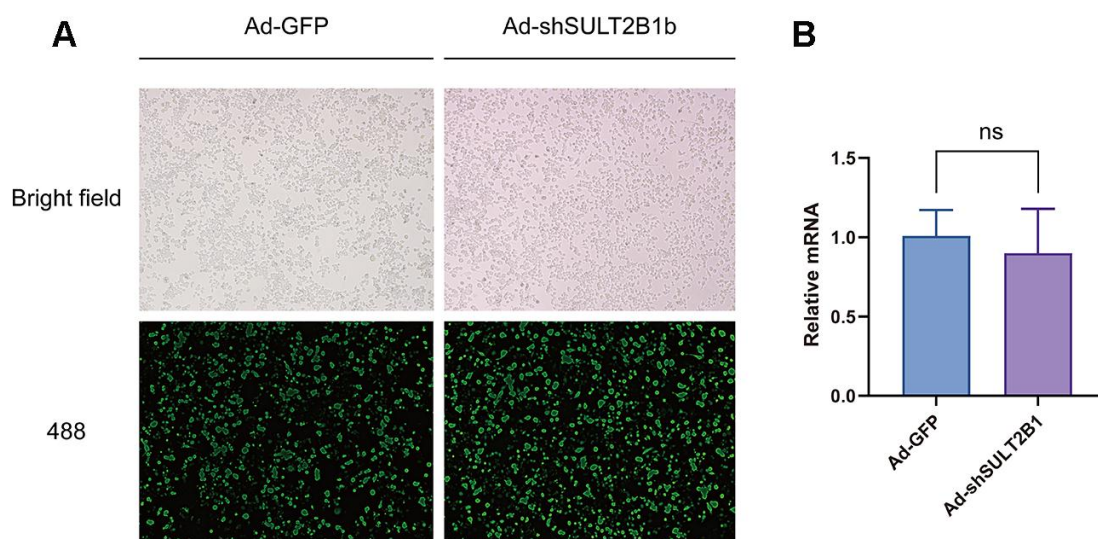

**Supplementary Figure 1. Successful transfection of Ad-GFP and Ad-shSULT2B1-GFP into macrophages.** Raw264.7 cells were transfected with Ad-GFP and Ad-shSULT2B1-GFP, respectively. (A) After 24h of transfection, the fluorescent intensity was monitored by inverted fluorescence microscopy. (B) The expression of GFP mRNA was determined by RT-qPCR. Data are shown as mean±SD (n=3). \*\*p<0.01, \*\*\*p<0.001.

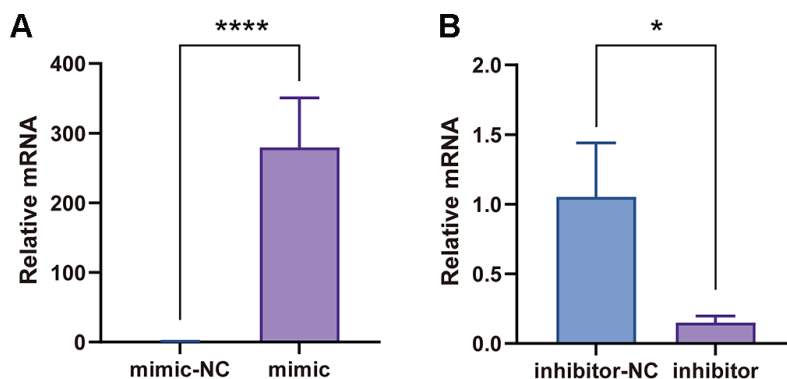

**Supplementary Figure 2. The effects of mimic and inhibitor of miR148a-3p on expression level of miR148a-3p in macrophages.** (A, B) The expression of miR148a-3p were significantly increased or decreased after transfection with miR148a-3p mimic (A) and inhibitor (B), respectively. Data are shown as mean±SD (n=3). \*\*p<0.01, \*\*\*p<0.001.
